# Supplementary material for: Socioeconomic disparities in coverage of full immunisation among children of adolescent mothers in India, 1990–2006: a repeated cross-sectional analysis
Source: PubMed Central journal article supplement — BMJ Open. 2016 Aug 12;6(8):e009768. doi: 10.1136/bmjopen-2015-009768 (PMC4985793; doi:10.1136/bmjopen-2015-009768), 2016-08-12
Supplement: bmjopen-2015-009768supp_tables.pdf [file bmjopen-2015-009768supp_tables.pdf]

|            |      |       |      |       |      |     |
|------------|------|-------|------|-------|------|-----|
| North      | 9.2  | 803   | 8.1  | 703   | 8.4  | 335 |
| Central    | 23.5 | 1,014 | 29.9 | 1,176 | 24.9 | 683 |
| East       | 23.5 | 917   | 22.6 | 878   | 33.8 | 722 |
| North-east | 4.2  | 467   | 3.5  | 479   | 3.8  | 480 |
| West       | 15.9 | 508   | 13.8 | 448   | 12.0 | 307 |
| South      | 23.8 | 956   | 22.2 | 781   | 17.2 | 507 |

---

Note:  $p$ -value represents Chi-squared test for differences in proportions by year group; 'N' represents unweighted sample size.

**Supplementary Table 2** Selected socioeconomic predictors for children (aged 12-23 months) of adult (aged >19 years) women accessing full immunization, India, 1990–2006.

| Children age 12-23 months<br>(N=4922) | Full Immunization   |                |                                    |                 |
|---------------------------------------|---------------------|----------------|------------------------------------|-----------------|
|                                       | Univariate analysis |                | Multivariate analysis <sup>a</sup> |                 |
|                                       | PP <sup>b</sup>     | (95% CI)       | PP <sup>c</sup>                    | (95% CI)        |
| <b>Period</b>                         |                     |                |                                    |                 |
| 1990-93                               | 0.354               | (0.340, 0.368) | 0.350                              | (0.336, 0.364)  |
| 1996-99                               | 0.419               | (0.403, 0.436) | 0.388                              | (0.370, 0.405)  |
| 2003-06                               | 0.442               | (0.424, 0.461) | 0.458                              | (0.438, 0.478)  |
|                                       |                     |                |                                    | <i>p</i> =0.003 |
| <b>Mother's education</b>             |                     |                |                                    |                 |
| Illiterate                            | 0.246               | (0.236, 0.257) | 0.246                              | (0.239, 0.254)  |
| Literate or below primary             | 0.455               | (0.424, 0.485) | 0.380                              | (0.372, 0.388)  |
| Primary                               | 0.520               | (0.496, 0.543) | 0.500                              | (0.492, 0.508)  |
| Middle                                | 0.601               | (0.577, 0.626) | 0.611                              | (0.601, 0.620)  |
| High school and above                 | 0.706               | (0.687, 0.724) | 0.744                              | (0.733, 0.754)  |
|                                       |                     |                |                                    | <i>p</i> <0.001 |
| <b>Father's education</b>             |                     |                |                                    |                 |
| Illiterate                            | 0.230               | (0.217, 0.244) | 0.230                              | (0.221, 0.239)  |
| Literate or below primary             | 0.382               | (0.356, 0.408) | 0.316                              | (0.308, 0.324)  |
| Primary                               | 0.404               | (0.384, 0.424) | 0.379                              | (0.371, 0.386)  |
| Middle                                | 0.443               | (0.423, 0.464) | 0.456                              | (0.447, 0.464)  |
| High school and above                 | 0.561               | (0.546, 0.576) | 0.615                              | (0.604, 0.625)  |
|                                       |                     |                |                                    | <i>p</i> <0.001 |
| <b>Social group</b>                   |                     |                |                                    |                 |
| Other than SC and ST                  | 0.430               | (0.418, 0.441) | 0.462                              | (0.454, 0.470)  |
| SC                                    | 0.360               | (0.340, 0.381) | 0.338                              | (0.329, 0.348)  |
| ST                                    | 0.263               | (0.238, 0.291) | 0.264                              | (0.251, 0.278)  |
|                                       |                     |                |                                    | <i>p</i> <0.001 |
| <b>Wealth quintile</b>                |                     |                |                                    |                 |
| Poorest                               | 0.213               | (0.198, 0.229) | 0.191                              | (0.183, 0.200)  |
| Poorer                                | 0.303               | (0.287, 0.320) | 0.275                              | (0.268, 0.283)  |
| Middle                                | 0.413               | (0.396, 0.432) | 0.404                              | (0.397, 0.411)  |
| Richer                                | 0.570               | (0.551, 0.589) | 0.567                              | (0.558, 0.575)  |
| Richest                               | 0.640               | (0.620, 0.659) | 0.690                              | (0.679, 0.700)  |
|                                       |                     |                |                                    | <i>p</i> <0.001 |
| <b>Area of residence</b>              |                     |                |                                    |                 |
| Rural                                 | 0.348               | (0.337, 0.360) | 0.341                              | (0.333, 0.349)  |
| Urban                                 | 0.563               | (0.544, 0.582) | 0.577                              | (0.565, 0.589)  |
|                                       |                     |                |                                    | <i>p</i> =0.129 |

<sup>a</sup>Multivariate model controls for mother's age at child birth, religion, work status of mother, parity, birth order & interval, mass-media exposure of mother, desirable status of the child, utilization of full antenatal care by mother, professional attendance at delivery, and region of residence besides all variables shown in the table.

<sup>b</sup>Unadjusted Predicted Probability

<sup>c</sup>Adjusted Predicted Probability

Note: *p*-value refers to adjusted Wald test.

**Supplementary Table 3.** Proportion of adolescent women (aged 15-19), their marriage status and children ever born across states/union territories, India, 2011.

| Sl. No. | State/UT/India         | Adolescent women (15-19) |              |            |            |            |            |            |
|---------|------------------------|--------------------------|--------------|------------|------------|------------|------------|------------|
|         |                        | Total                    |              |            | Rural      |            | SC/ST      |            |
|         |                        | Women (%)                | EMW %        | CEB (%)    | Women (%)  | CEB (%)    | Women (%)  | CEB (%)    |
| 1.      | Jammu & Kashmir        | 1.06                     | 8.75         | 0.52       | 1.14       | 0.54       | 0.77       | 0.48       |
| 2.      | Himachal Pradesh       | 0.54                     | 9.21         | 0.22       | 0.70       | 0.26       | 0.68       | 0.32       |
| 3.      | Punjab                 | 2.21                     | 10.44        | 1.04       | 2.06       | 0.88       | 3.05       | 1.34       |
| 4.      | Uttarakhand            | 0.95                     | 10.44        | 0.48       | 0.98       | 0.48       | 0.83       | 0.47       |
| 5.      | Haryana                | 2.10                     | 16.63        | 1.62       | 2.05       | 1.56       | 1.77       | 1.18       |
| 6.      | Delhi                  | 1.31                     | 9.78         | 0.56       | 0.05       | 0.03       | 0.97       | 0.38       |
| 7.      | Rajasthan              | 6.06                     | 28.82        | 6.62       | 6.56       | 6.99       | 7.33       | 7.60       |
| 8.      | Uttar Pradesh          | 18.98                    | 16.45        | 16.61      | 21.07      | 17.83      | 14.99      | 12.83      |
| 9.      | Bihar                  | 7.40                     | 26.02        | 10.51      | 9.21       | 12.30      | 4.28       | 7.44       |
| 10.     | Sikkim                 | 0.06                     | 16.86        | 0.05       | 0.06       | 0.06       | 0.09       | 0.07       |
| 11.     | Arunachal Pradesh      | 0.14                     | 14.85        | 0.11       | 0.15       | 0.11       | 0.39       | 0.24       |
| 12.     | Nagaland               | 0.20                     | 9.41         | 0.10       | 0.20       | 0.09       | 0.68       | 0.24       |
| 13.     | Manipur                | 0.25                     | 10.29        | 0.15       | 0.27       | 0.13       | 0.48       | 0.19       |
| 14.     | Mizoram                | 0.10                     | 12.48        | 0.07       | 0.06       | 0.06       | 0.35       | 0.23       |
| 15.     | Tripura                | 0.31                     | 25.72        | 0.49       | 0.34       | 0.52       | 0.64       | 0.91       |
| 16.     | Meghalaya              | 0.29                     | 18.05        | 0.32       | 0.32       | 0.38       | 0.97       | 0.93       |
| 17.     | Assam                  | 2.61                     | 22.72        | 3.12       | 3.24       | 3.70       | 2.10       | 1.79       |
| 18.     | West Bengal            | 7.70                     | 28.44        | 13.00      | 7.84       | 13.42      | 8.79       | 14.49      |
| 19.     | Jharkhand              | 2.64                     | 25.06        | 3.75       | 2.77       | 3.96       | 3.90       | 4.77       |
| 20.     | Odisha                 | 3.45                     | 14.86        | 2.40       | 4.13       | 2.66       | 5.38       | 4.02       |
| 21.     | Chhattisgarh           | 2.26                     | 14.55        | 1.65       | 2.51       | 1.76       | 3.79       | 2.50       |
| 22.     | Madhya Pradesh         | 6.13                     | 21.40        | 6.57       | 6.35       | 6.92       | 8.68       | 10.09      |
| 23.     | Gujarat                | 4.81                     | 20.28        | 5.02       | 4.13       | 4.02       | 4.10       | 4.46       |
| 24.     | Maharashtra            | 8.70                     | 19.92        | 8.71       | 7.04       | 7.27       | 7.58       | 8.11       |
| 25.     | Andhra Pradesh         | 6.89                     | 20.99        | 7.26       | 6.44       | 6.72       | 6.59       | 6.88       |
| 26.     | Karnataka              | 4.93                     | 20.47        | 4.46       | 4.38       | 3.87       | 4.90       | 4.69       |
| 27.     | Goa                    | 0.10                     | 12.79        | 0.04       | 0.05       | 0.01       | 0.05       | 0.01       |
| 28.     | Kerala                 | 2.27                     | 12.71        | 1.06       | 1.70       | 0.81       | 0.88       | 0.32       |
| 29.     | Tamil Nadu             | 5.35                     | 15.12        | 3.35       | 4.09       | 2.58       | 4.77       | 2.88       |
|         | <b>Union territory</b> |                          |              |            |            |            |            |            |
| 1.      | Chandigarh             | 0.08                     | 9.18         | 0.03       | 0.00       | 0.00       | 0.07       | 0.03       |
| 2.      | Daman & Diu            | 0.01                     | 17.86        | 0.01       | 0.01       | 0.00       | 0.01       | 0.01       |
| 3.      | Dadra & Nagar Haveli   | 0.02                     | 23.35        | 0.03       | 0.02       | 0.03       | 0.06       | 0.07       |
| 4.      | Lakshadweep            | 0.00                     | 8.24         | 0.00       | 0.00       | 0.00       | 0.02       | 0.00       |
| 5.      | Puducherry             | 0.09                     | 11.53        | 0.05       | 0.04       | 0.03       | 0.06       | 0.04       |
| 6.      | A & N Islands          | 0.03                     | 15.48        | 0.02       | 0.02       | 0.02       | 0.01       | 0.00       |
|         | <b>India</b>           | <b>100</b>               | <b>19.86</b> | <b>100</b> | <b>100</b> | <b>100</b> | <b>100</b> | <b>100</b> |

EMW: Ever Married Women; CEB: Child Ever Born
